# Supplementary material
Source: PubMed Central journal article supplement (PMC3428075)
Supplement: JCI57407sd.pdf [file JCI57407sd.pdf]

## **SUPPLEMENTARY FIGURES**

### **Supplementary Figure 1: immunoprecipitation with anti-Casr antibody**

The Casr protein was expressed in transiently transfected HEK cells. Cell lysates from HEK cells were subjected to immunoprecipitation (IP) using either anti-Casr antibodies ab 10-12 or MA1-934. Samples were submitted to SDS-Page and blotted with anti Casr antibodies. The Casr protein was detected as 2 bands: one at 150 kDa and the other one at 250 kDa. Note that the Casr protein was not detected in mock preparations.

### **Supplementary Figure 2: Casr staining extinction by the immunizing peptide**

**(A)** Immunoperoxidase staining in rat kidney sections using 1:500 anti Casr Ab 10-12 showing a cytoplasmic and basolateral staining of tubular cells in the cortex. The stained tubules were present in the medullary rays and in the juxta-glomerular apparatus. Proximal tubules and glomeruli showed no detectable Casr staining. Immunohistochemistry showing a cytoplasmic peroxidase staining of rat kidney cortex using 1:500 anti Casr Ab 10-12.

**(B)** Control experiments using a 1:500 dilution of the affinity purified anti-Casr antibody preadsorbed with the immunizing peptide (100 µg/ml). The resulting medium was used as a negative control. Note that a non-specific background is seen in all tubules lumen in the presence of immunizing peptide

### **Supplementary Figure 3: Casr localization in mice kidney**

**(A)** Casr localization in renal mice cortex at low magnification (X100)

**(B)** Casr localization in renal mice cortex at high magnification (X1000)

**(C)** Casr localization in mice TAL by immunofluorescence and confocal microscopy showing a colocalization between Casr and Thp.

**(D)** Casr localization in mice CCD (Double staining with anti-Casr and anti-Aqp2 antibodies showing no colocalization between the 2 proteins).

**Supplementary Figure 4: CaSR localization in human kidney** showing a basolateral tubular CaSR staining without staining of proximal tubules individualized by brush borders (Panel A and B) and a colocalisation with Tamm Horsfall protein, demonstrating the CaSR localization in human TAL (Panel C) without costaining with AQP2 (Panel C).

**Supplementary Figure 5: Immunoblot of Casr peptide in mouse renal cortex preparation.** Each lane was loaded with 15 µg of protein. Anti-mouse Casr antibody detected Casr in kidney cortex but not in purified CCD preparation. Anti-mouse pendrin antibody used as a control, detected pendrin in both the kidney cortex and the purified CCD preparations. This experiment confirms the western blot experiment performed in rat CCD (Figure 5 Panel F).

**Supplementary Figure 6: Functional expression of Casr in the rat kidney.**

**A:** cortical thick ascending limbs were dissected from rat kidney and perfused *in vitro* as explained (see « Methods »). Peritubular addition of 1 µM NPS-R568 or 300 µM neomycin elicited a sudden increase in cytosolic free calcium concentration.

**B:** cortical collecting ducts were dissected from rat kidney and perfused *in vitro*. Peritubular addition of 1 µM NPS-R568 or 300 µM neomycin were unable to induce a significant increase in cytosolic free calcium concentration. Conversely, peritubular addition of 10 µM 2-furoyl-LIGRL-NH<sub>2</sub> (F-AP), a Protease Activated Receptor (PAR) 2 agonist (positive control), elicited an increase in cytosolic free calcium concentration.

**C:** cortical collecting ducts were dissected from rat kidney and perfused *in vitro*. Luminal addition of 1 µM NPS-R568, 300 µM neomycin, or 3 mM calcium chloride were unable to induce a significant increase in cytosolic free calcium concentration. Conversely, peritubular addition of 10 µM F-AP, a PAR2 agonist, elicited an increase in cytosolic free calcium concentration.

**Supplementary Figure 7:** Bone markers measurement in TPTX, PTH-supplemented rats treated or not by Casr antagonist NPS2143 (A, B) as compared to TPTX, PTH-supplemented rats treated by the anti-bone resorptive agent sodium pamidronate (C and D)

**Supplementary table 1:** Urinary parameter values in both groups of rats during acute studies with NPS2143

**Supplementary table 2:** Blood, urine and clinical parameter values in both groups of rats during chronic studies with NPS 2143

Supplementary Figure 1

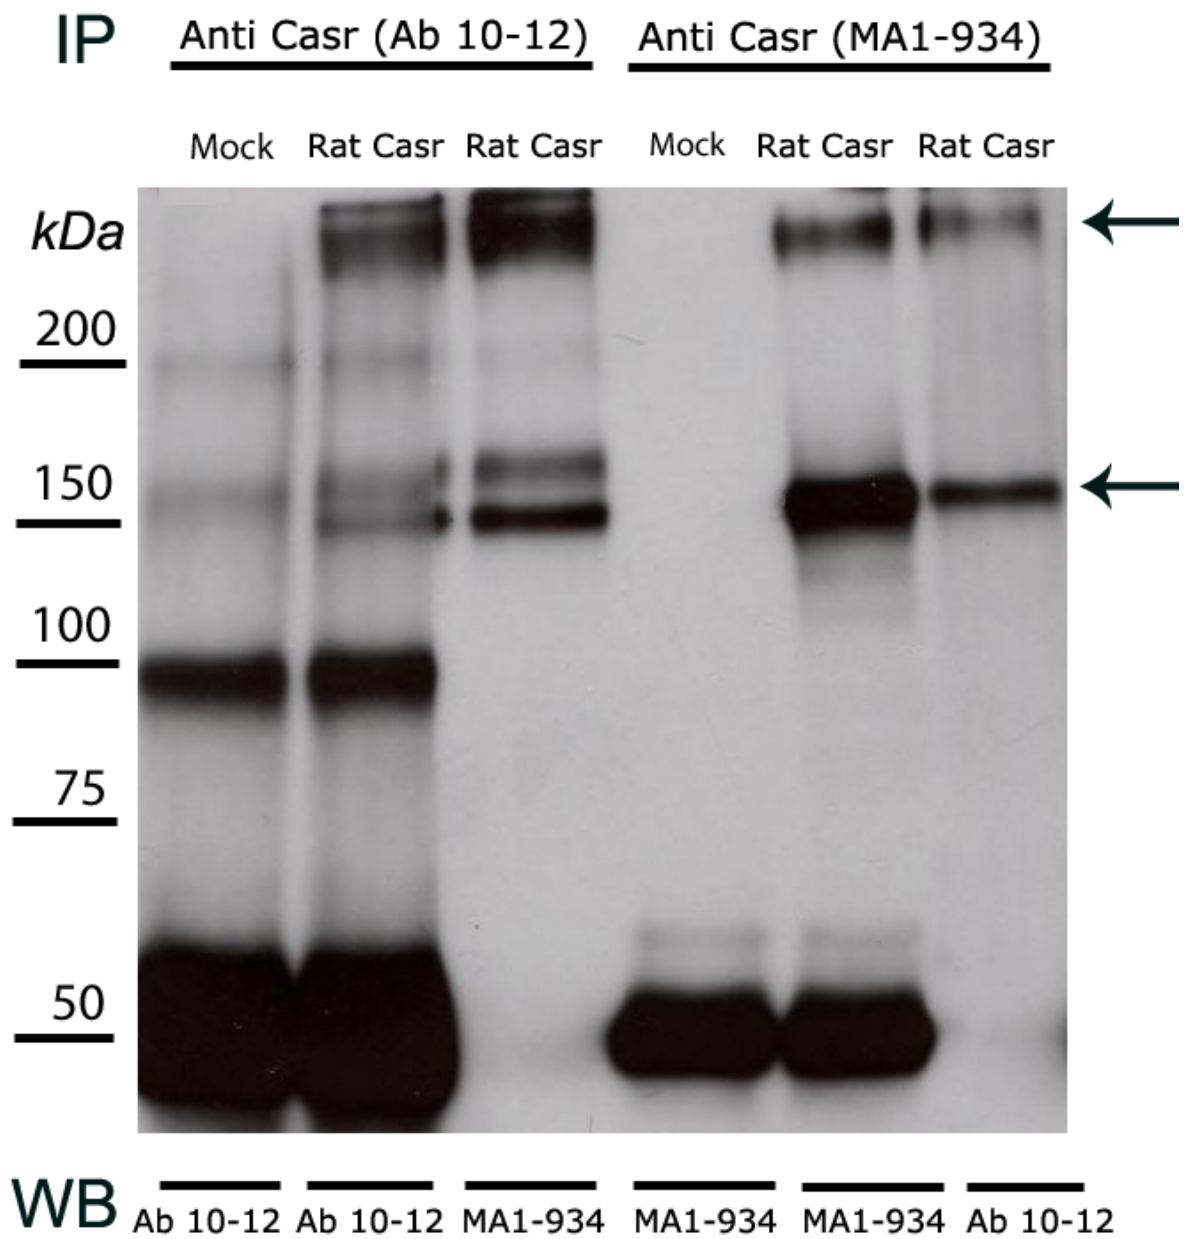

Supplementary Figure 2

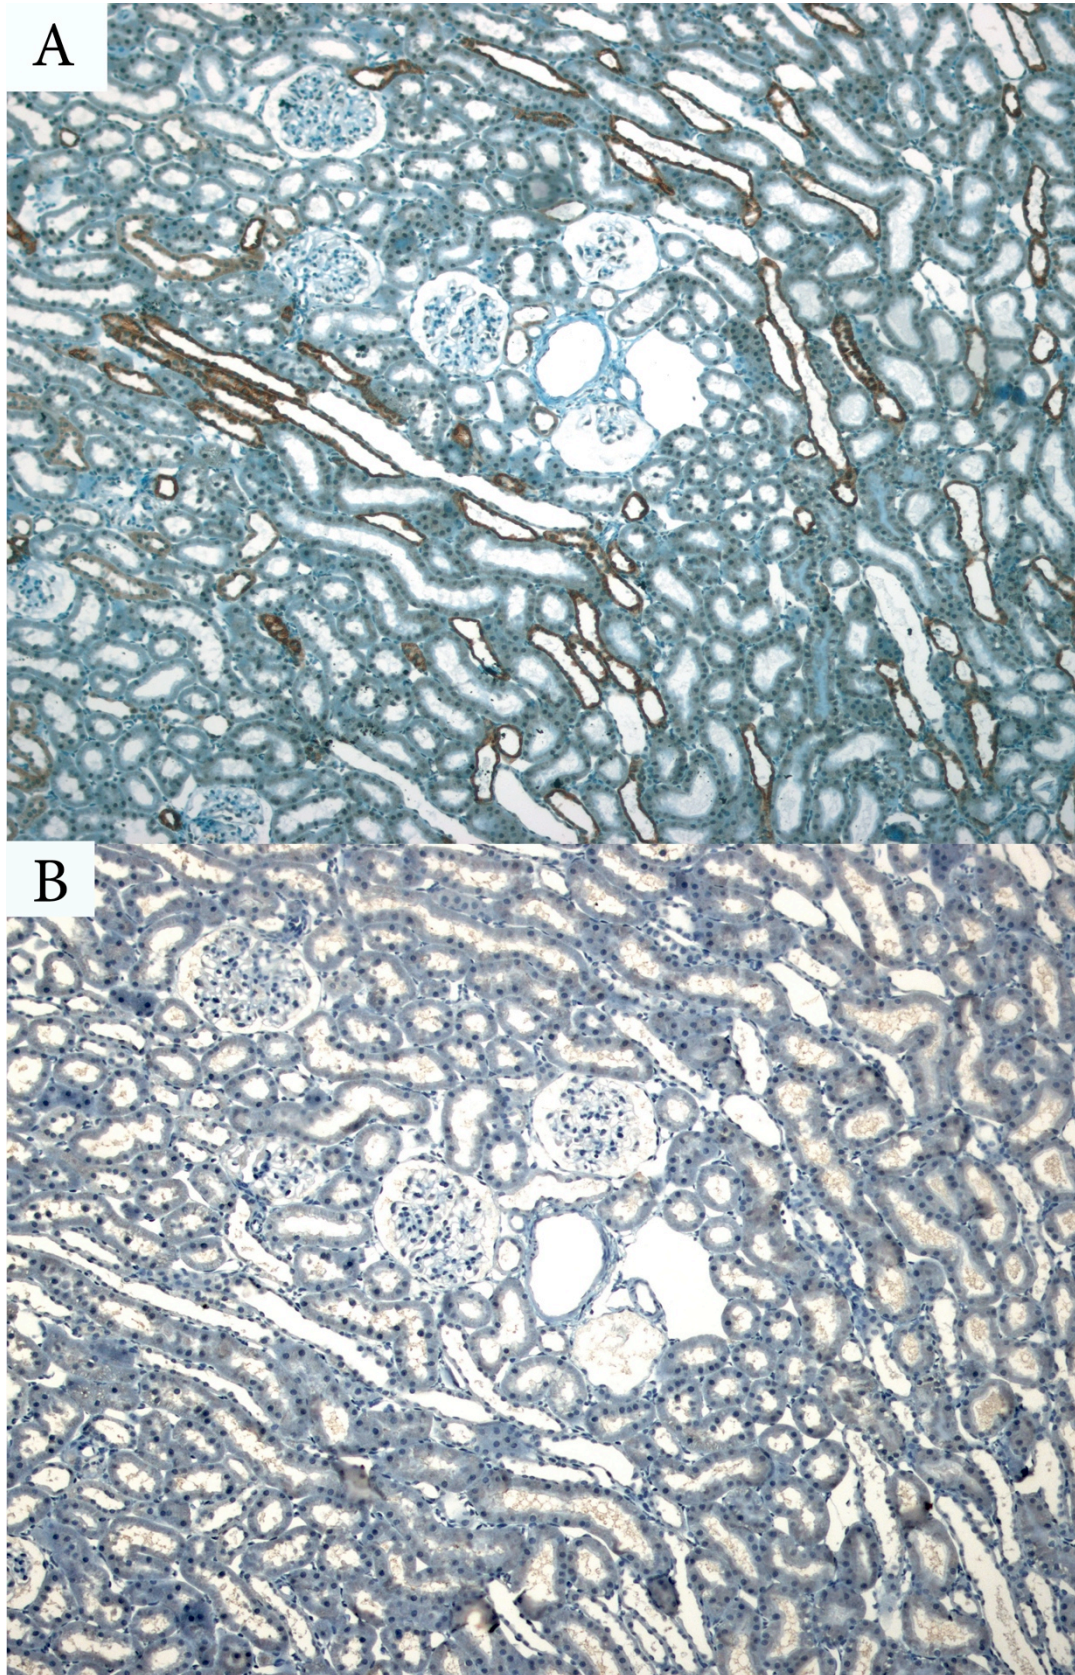

Supplementary Figure 3

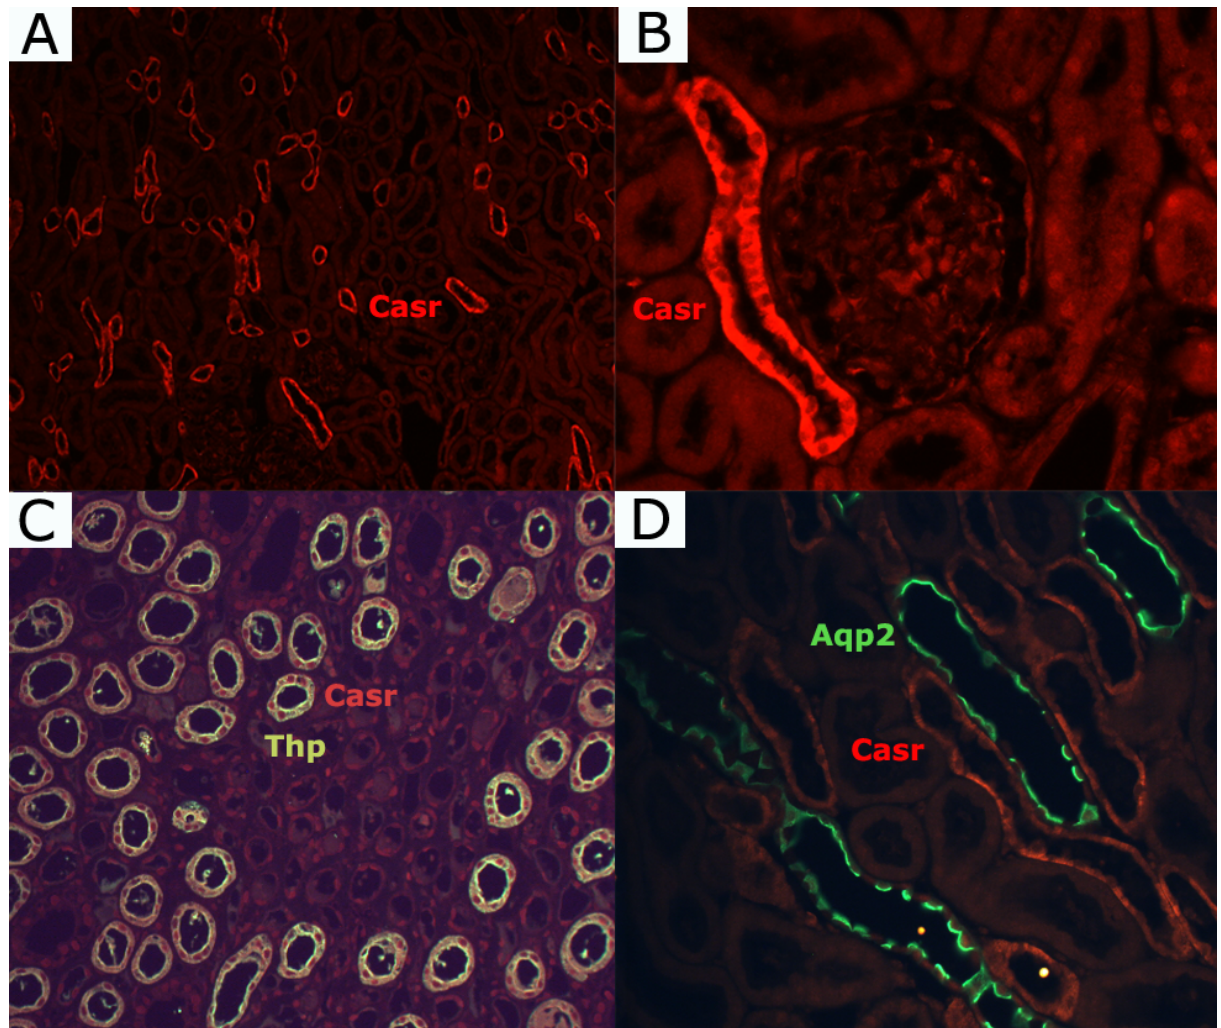

Supplementary Figure 4

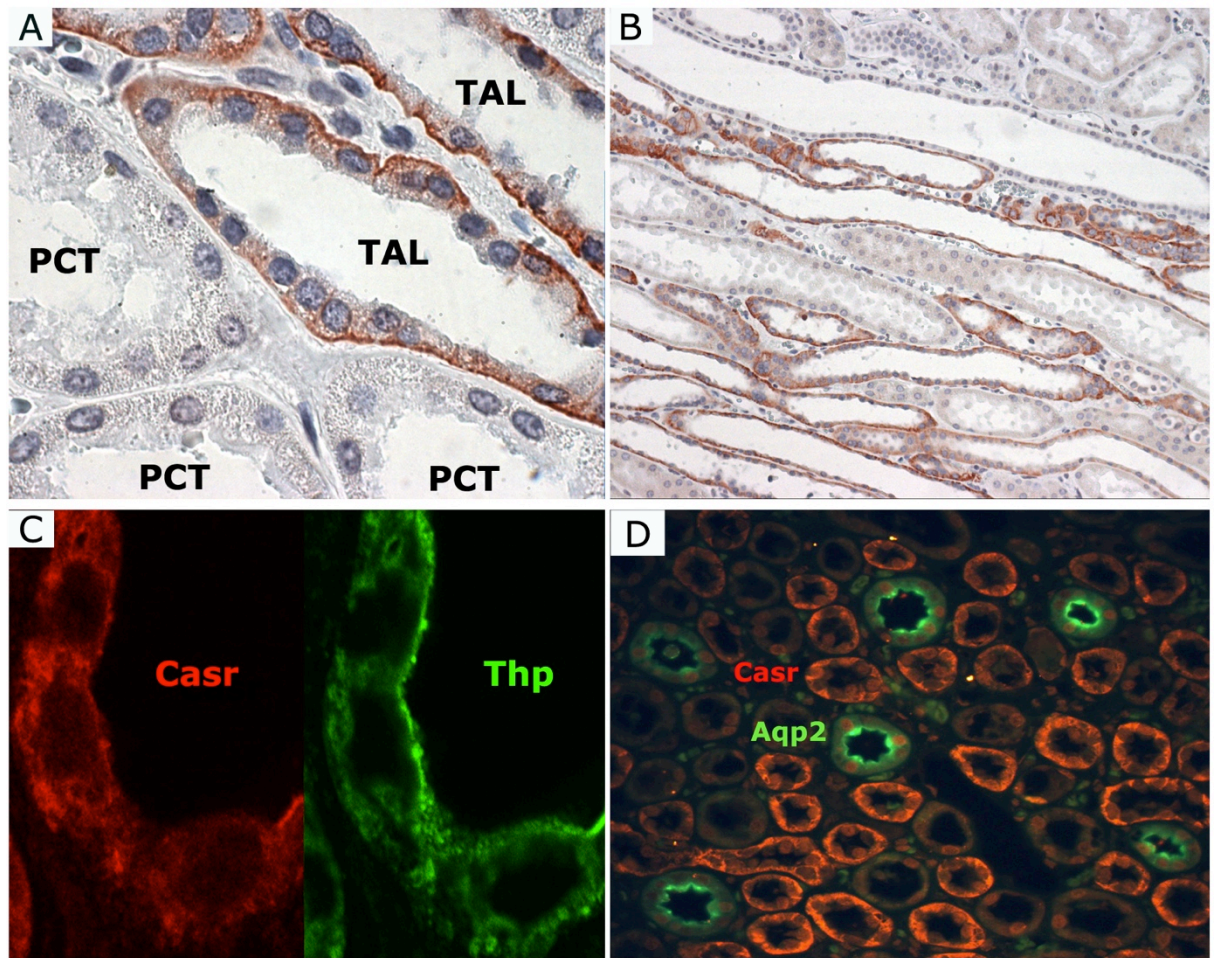

Supplementary Figure 5

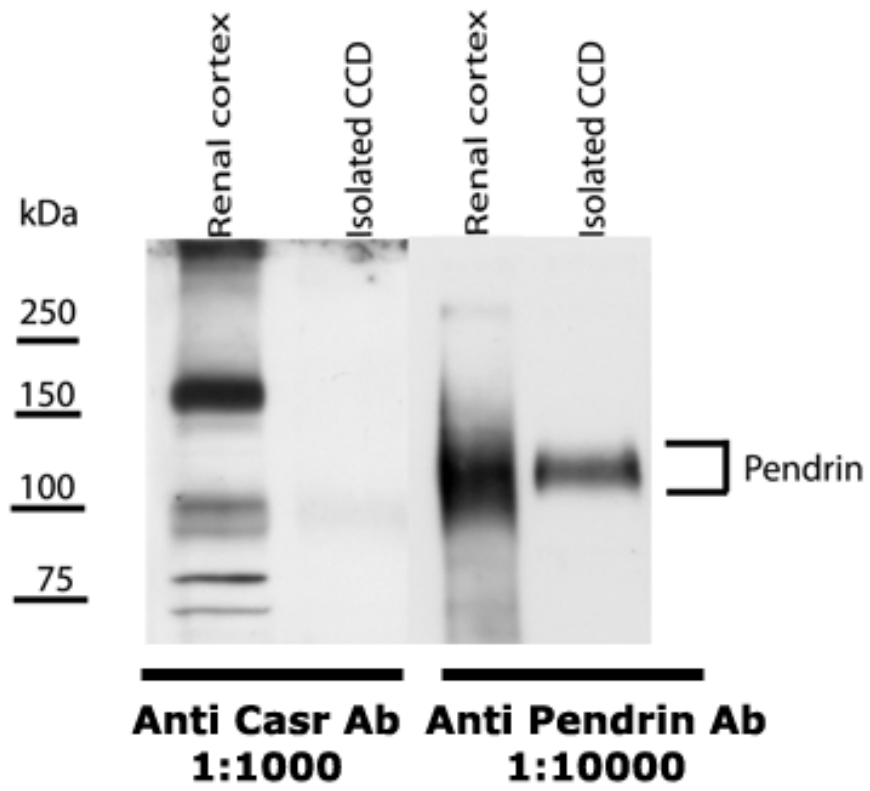

Supplementary Figure 6

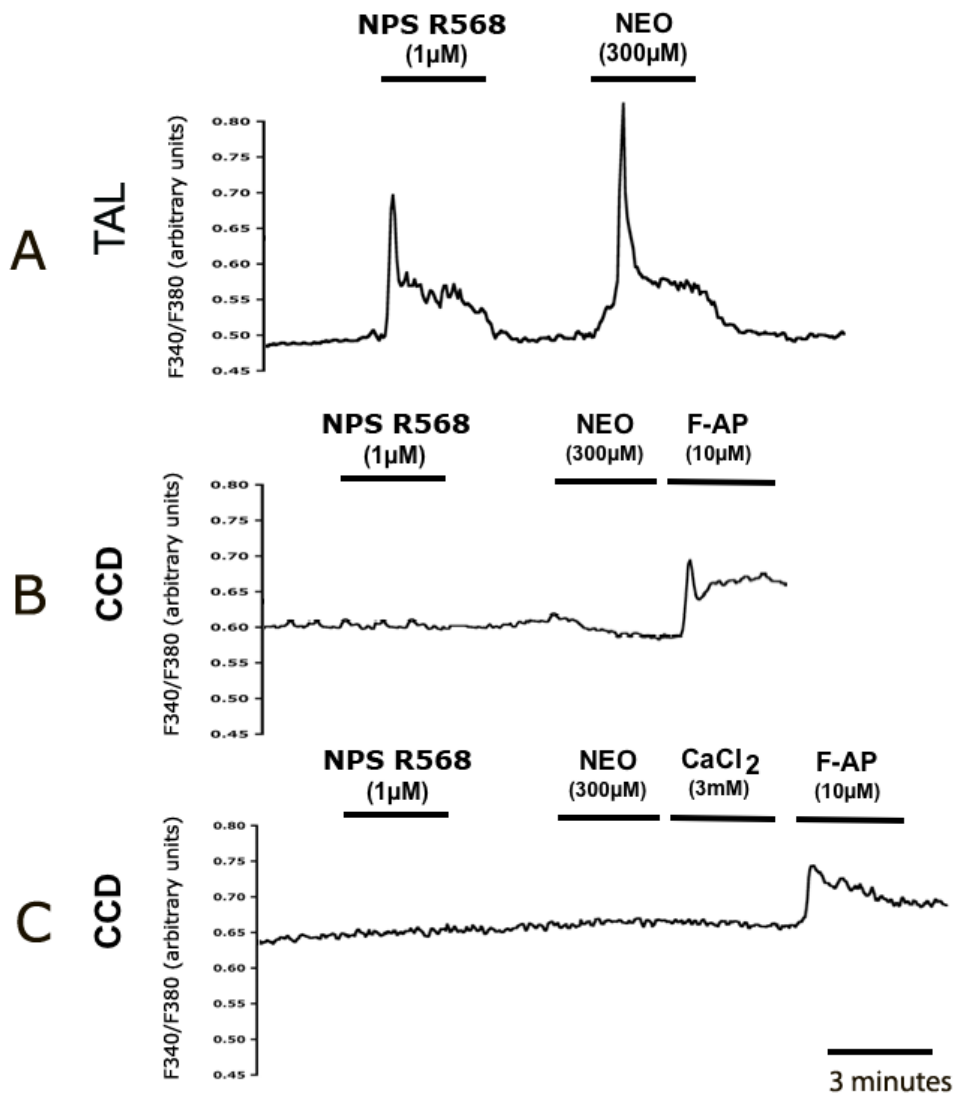



Supplementary Figure 7

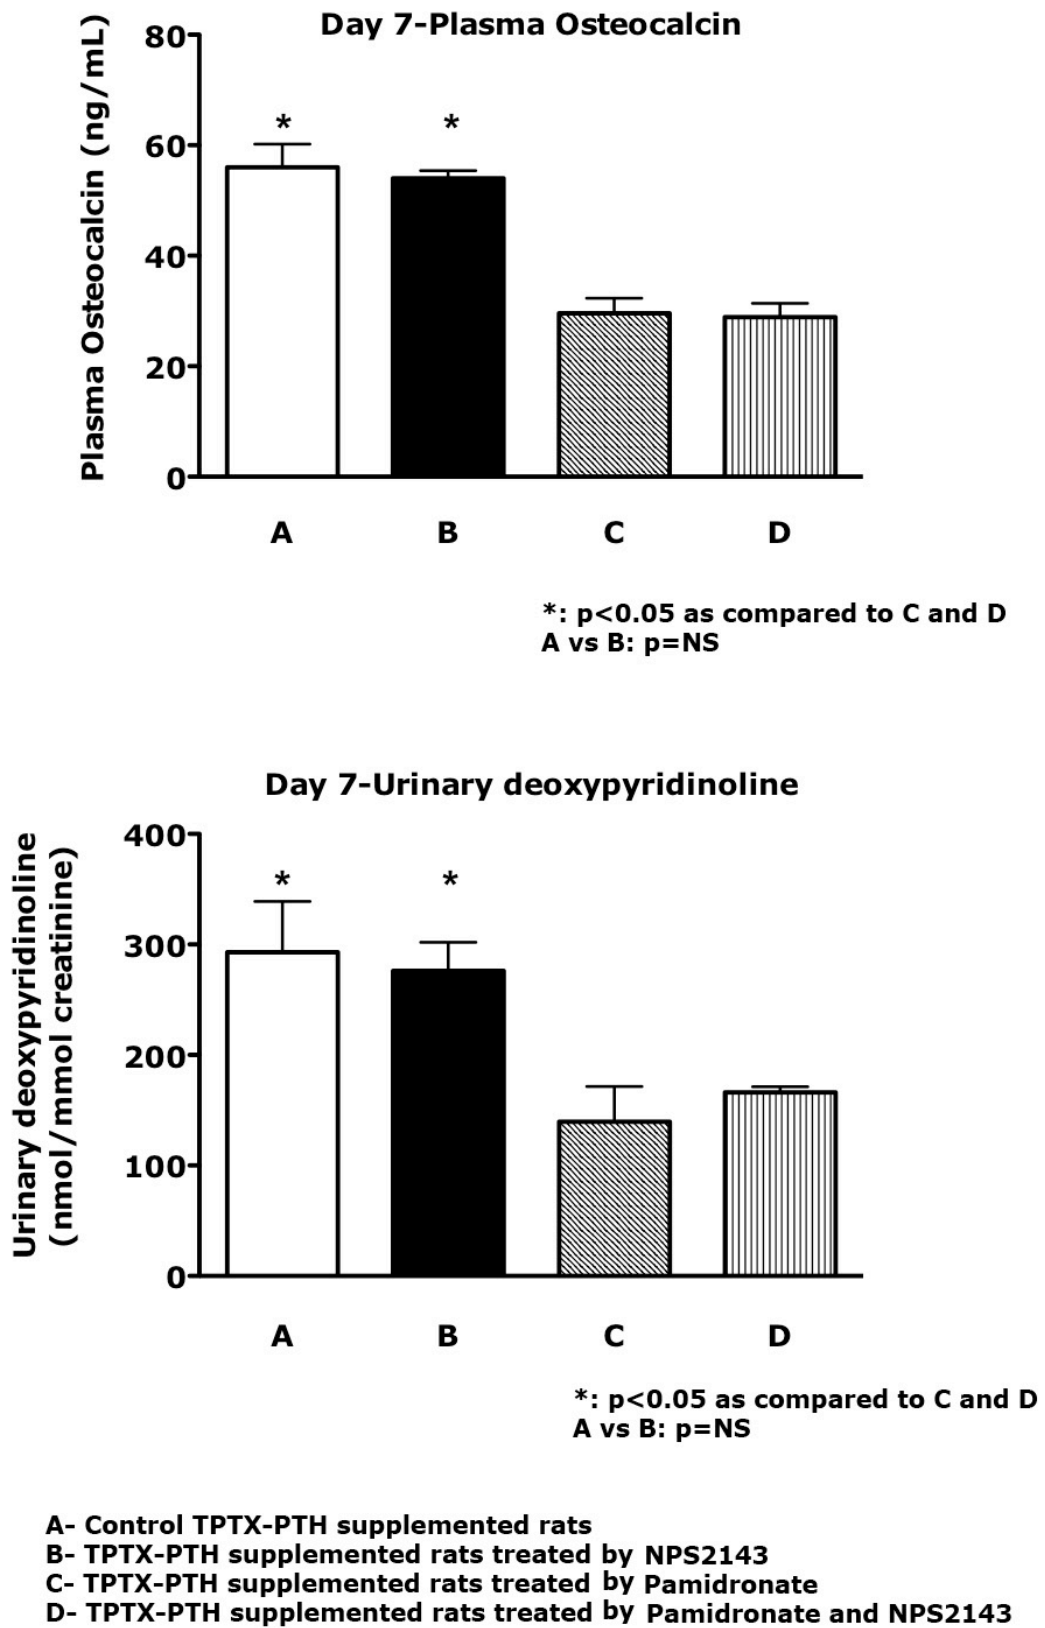

**Supplemental Table 1**

| <b>URINARY PARAMETERS</b>                  | <b>Baseline</b>  |                  | <b>Post-treatment</b> |                |
|--------------------------------------------|------------------|------------------|-----------------------|----------------|
|                                            | <b>Control *</b> | <b>NPS2143 *</b> | <b>Control</b>        | <b>NPS2143</b> |
| <b>Creatinine excretion (nmol/minute)</b>  | 28.6 ± 3.4       | 27.9 ± 4.7       | 33.3 ± 7.5            | 31.6 ± 8.9     |
| <b>Na/creatinine (mmol/mmol)</b>           | 11.3 ± 15.3      | 13.2 ± 4.2       | 13 ± 1.4              | 11.9 ± 0.9     |
| <b>K/Creatinine (mmol/mmol)</b>            | 25.9 ± 9.6       | 23.3 ± 3         | 17.6 ± 1.7            | 20 ± 8.1       |
| <b>Urinary pH</b>                          | 7.33 ± 0.1       | 7.25 ± 0.1       | 7.52 ± 0.1            | 7.45 ± 0.1     |
| <b>Osmolarity (mOsm/Kg)</b>                | 1413 ± 60        | 1365 ± 75        | 1299 ± 158            | 1375 ± 258     |
| <b>HCO<sub>3</sub><sup>-</sup> (mEq/L)</b> | 22.0 ± 3         | 17.9 ± 2         | 29.0 ± 0.4            | 27.5 ± 0.6     |

**\* N = 6 in each group**

Supplemental Table 2

|                                                         | Day-0     |           | Day 1    |           | Day 2    |           | Day 4     |           | Day 7    |           |
|---------------------------------------------------------|-----------|-----------|----------|-----------|----------|-----------|-----------|-----------|----------|-----------|
|                                                         | Control * | NPS1243 * | Control  | NPS1243   | Control  | NPS1243   | Control   | NPS1243   | Control  | NPS1243   |
| <b>Weight (g)</b>                                       | 328±15    | 355±17    | 330±12   | 354±19    | 329±12   | 354±13    | 327±13    | 355±11    | 325±4    | 317±9     |
| <b>Food intake (g/24H)</b>                              | 19.4±5    | 19.6±2.5  | 18.1±3.8 | 17.3±3    | 23.3±3.3 | 21.6±5.5  | 18.9±4    | 18.5±2.4  | 19.1±7.4 | 15.6±8.2  |
| <b>Water intake (mL/24h)</b>                            | 26.5±7.1  | 27.3±10.4 | 24.5±6.4 | 23.7±3.9  | 27.8±10  | 24.6±7    | 22.3±9.3  | 27.5±5.2  | 21.7±6   | 22.4±12   |
| <b>Urine output (mL/24h)</b>                            | 12.1±8.6  | 12.6±4.8  | 10.4±6.4 | 10.6±2.7  | 11.6±6.5 | 10.3±3.8  | 12.6±6.8  | 11.7±5.2  | 12.0±8.9 | 10.4±3.3  |
| <b>Urinary osmolarity (mOsm/kg)</b>                     | 1345±157  | 1459±232  | 1455±128 | 1328±98   | -        | -         | -         | -         | 1512±126 | 1452±214  |
| <b>Urinary Ca excretion (nmol/min)</b>                  | 32.4±11.3 | 36.2±9.4  | 34.4±8.3 | 22.0±5.3* | 30.2±9.6 | 36.5±11.6 | 34.2±10.4 | 38.9±11.2 | 31.7±8.9 | 35.5±13.8 |
| <b>Urinary Mg (mmol/mmol creatinine)</b>                | 2.2±0.3   | 1.9±0.4   | 2.4±0.4  | 2.1±0.6   | -        | -         | -         | -         | 1.7±0.5  | 1.9±0.7   |
| <b>Urinary deoxypyridinoline (nmol/mmol creatinine)</b> | 245±11    | 284±8     |          |           |          |           |           |           | 293±46   | 276±26    |
| <b>1,25(OH)<sub>2</sub>D (pmol/L)</b>                   |           |           |          |           |          |           |           |           | 483±49   | 348±47    |
| <b>Plasma creatinine (μmol/L)</b>                       | 26.9±4.5  | 26.2±5.5  | -        | -         | -        | -         | -         | -         | 32.9±2.6 | 33.2±3.4  |
| <b>Plasma osteocalcin (ng/mL)</b>                       |           |           |          |           |          |           |           |           | 56±4.2   | 54±1.4    |
| <b>Dietary Ca intake (mmol/24 h)</b>                    | 5.2±1.0   | 5.3±0.6   | 4.8±1.0  | 4.7±0.8   | 6.3±0.8  | 5.8±1.5   | 5.1±1.0   | 5.0±0.6   | 5.1±2.0  | 4.2±2.0   |
| <b>Fecal Ca output (mmol/24h)</b>                       | 3.4±0.4   | 3.8±0.3   | 3.2±0.6  | 2.6±0.8   | 2.6±0.5  | 2.9±0.6   | N/A       | N/A       | 3.0±0.8  | 3.3±1     |
| <b>Intestinal Ca absorption (mmol/24h)</b>              | 1.8±0.8   | 1.5±0.5   | 1.6±1.0  | 2.1±1.3   | 3.7±0.6  | 2.9±1.1   | N/A       | N/A       | 2.1±1.4  | 0.9±1.6   |

\*N= 9 in each group

\*p=0.04 as compared to controls
